# Supplementary material for: Systematic comparison of three genomic enrichment methods for massively parallel DNA sequencing
Source: HighWire-hosted journal article supplement (doi:10.1101/gr.106716.110), 2010-09-01
Supplement: Teer_Supp_Table_1.pdf [file Teer_Supp_Table_1.pdf]

**Supplemental Table 1. Index Sequences for MGS Multiplexing**

| Index ID | Index (5'-3') | Sequence of adapter oligos (5'-3')                                                                                         |
|----------|---------------|----------------------------------------------------------------------------------------------------------------------------|
| 1        | AAGGAT        | /5Phos/ <u><b>TCCTTA</b></u> GATCGGAAGAGCGGTTCAGCAGGAATGCCGAG<br>ACACTCTTTCCCTACACGACGCTCTTCCGATCT <u><b>AAGGA</b></u> *T  |
| 2        | ACACAT        | /5Phos/ <u><b>TGTGTA</b></u> GATCGGAAGAGCGGTTCAGCAGGAATGCCGAG<br>ACACTCTTTCCCTACACGACGCTCTTCCGATCT <u><b>ACACA</b></u> *T  |
| 3        | CAACCT        | /5Phos/ <u><b>GGTTGA</b></u> GATCGGAAGAGCGGTTCAGCAGGAATGCCGAG<br>ACACTCTTTCCCTACACGACGCTCTTCCGATCT <u><b>CAACC</b></u> *T  |
| 4        | GGTTGT        | /5Phos/ <u><b>CAACCA</b></u> GATCGGAAGAGCGGTTCAGCAGGAATGCCGAG<br>ACACTCTTTCCCTACACGACGCTCTTCCGATCT <u><b>GGTTG</b></u> *T  |
| 5        | GTGATT        | /5Phos/ <u><b>ATCACAG</b></u> GATCGGAAGAGCGGTTCAGCAGGAATGCCGAG<br>ACACTCTTTCCCTACACGACGCTCTTCCGATCT <u><b>GTGAT</b></u> *T |
| 6        | CTCGTT        | /5Phos/ <u><b>ACGAGA</b></u> GATCGGAAGAGCGGTTCAGCAGGAATGCCGAG<br>ACACTCTTTCCCTACACGACGCTCTTCCGATCT <u><b>CTCGT</b></u> *T  |
| 7        | TCTAGT        | /5Phos/ <u><b>CTAGAA</b></u> GATCGGAAGAGCGGTTCAGCAGGAATGCCGAG<br>ACACTCTTTCCCTACACGACGCTCTTCCGATCT <u><b>TCTAG</b></u> *T  |
| 8        | TGCTCT        | /5Phos/ <u><b>GAGCAA</b></u> GATCGGAAGAGCGGTTCAGCAGGAATGCCGAG<br>ACACTCTTTCCCTACACGACGCTCTTCCGATCT <u><b>TGCTC</b></u> *T  |
| 9        | AGAGCT        | /5Phos/ <u><b>GCTCTA</b></u> GATCGGAAGAGCGGTTCAGCAGGAATGCCGAG<br>ACACTCTTTCCCTACACGACGCTCTTCCGATCT <u><b>AGAGC</b></u> *T  |
| 10       | CCGTAT        | /5Phos/ <u><b>TACGGA</b></u> GATCGGAAGAGCGGTTCAGCAGGAATGCCGAG<br>ACACTCTTTCCCTACACGACGCTCTTCCGATCT <u><b>CCGTA</b></u> *T  |
| 11       | GATCAT        | /5Phos/ <u><b>TGATCA</b></u> GATCGGAAGAGCGGTTCAGCAGGAATGCCGAG<br>ACACTCTTTCCCTACACGACGCTCTTCCGATCT <u><b>GATCA</b></u> *T  |
| 12       | TTCCGT        | /5Phos/ <u><b>CGGAAA</b></u> GATCGGAAGAGCGGTTCAGCAGGAATGCCGAG<br>ACACTCTTTCCCTACACGACGCTCTTCCGATCT <u><b>TTCCG</b></u> *T  |

Index bases are in bold and underlined.

\* = phosphorothioate bond and 5Phos = 5' phosphate.
